# Supplementary material
Source: PubMed Central journal article supplement (PMC6081249)
Supplement: NIHMS975527-supplement-1.pdf [file NIHMS975527-supplement-1.pdf]

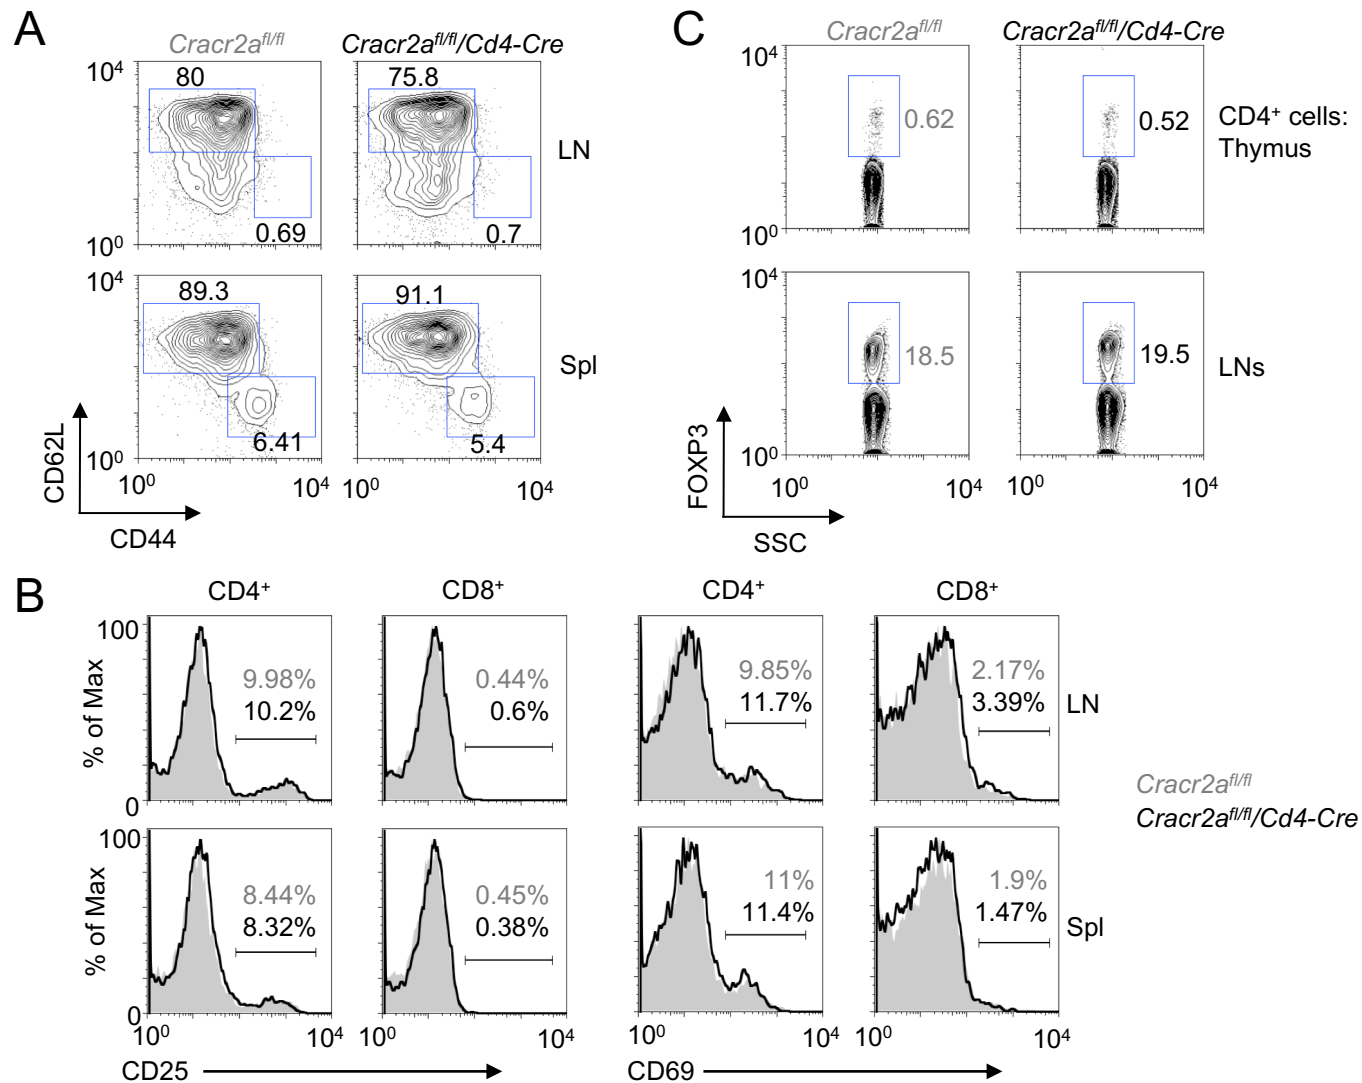

**Supplementary Figure 1. Conditional deletion of *Cracr2a* does not affect expression of T cell activation markers and development of Tregs in vivo**  
**(A)** Naïve and effector CD4<sup>+</sup> T cell populations in the lymph nodes (LN) and spleens (Spl) of *Cracr2a<sup>fl/fl</sup>* or *Cracr2a<sup>fl/fl</sup>/Cd4-Cre* mice determined using surface staining for CD62L and CD44.  
**(B)** Representative flow plots showing expression of CD25 (left two panels) and CD69 (right two panels) markers in CD4<sup>+</sup> and CD8<sup>+</sup> T cells from lymph nodes and spleens of *Cracr2a<sup>fl/fl</sup>* or *Cracr2a<sup>fl/fl</sup>/Cd4-Cre* mice as judged by surface staining.  
**(C)** Representative flow plots showing frequencies of regulatory T cells (CD4<sup>+</sup>FOXP3<sup>+</sup>) from the thymi and lymph nodes of *Cracr2a<sup>fl/fl</sup>* or *Cracr2a<sup>fl/fl</sup>/Cd4-Cre* mice. Data in all the panels are representative of at least three independent animals.

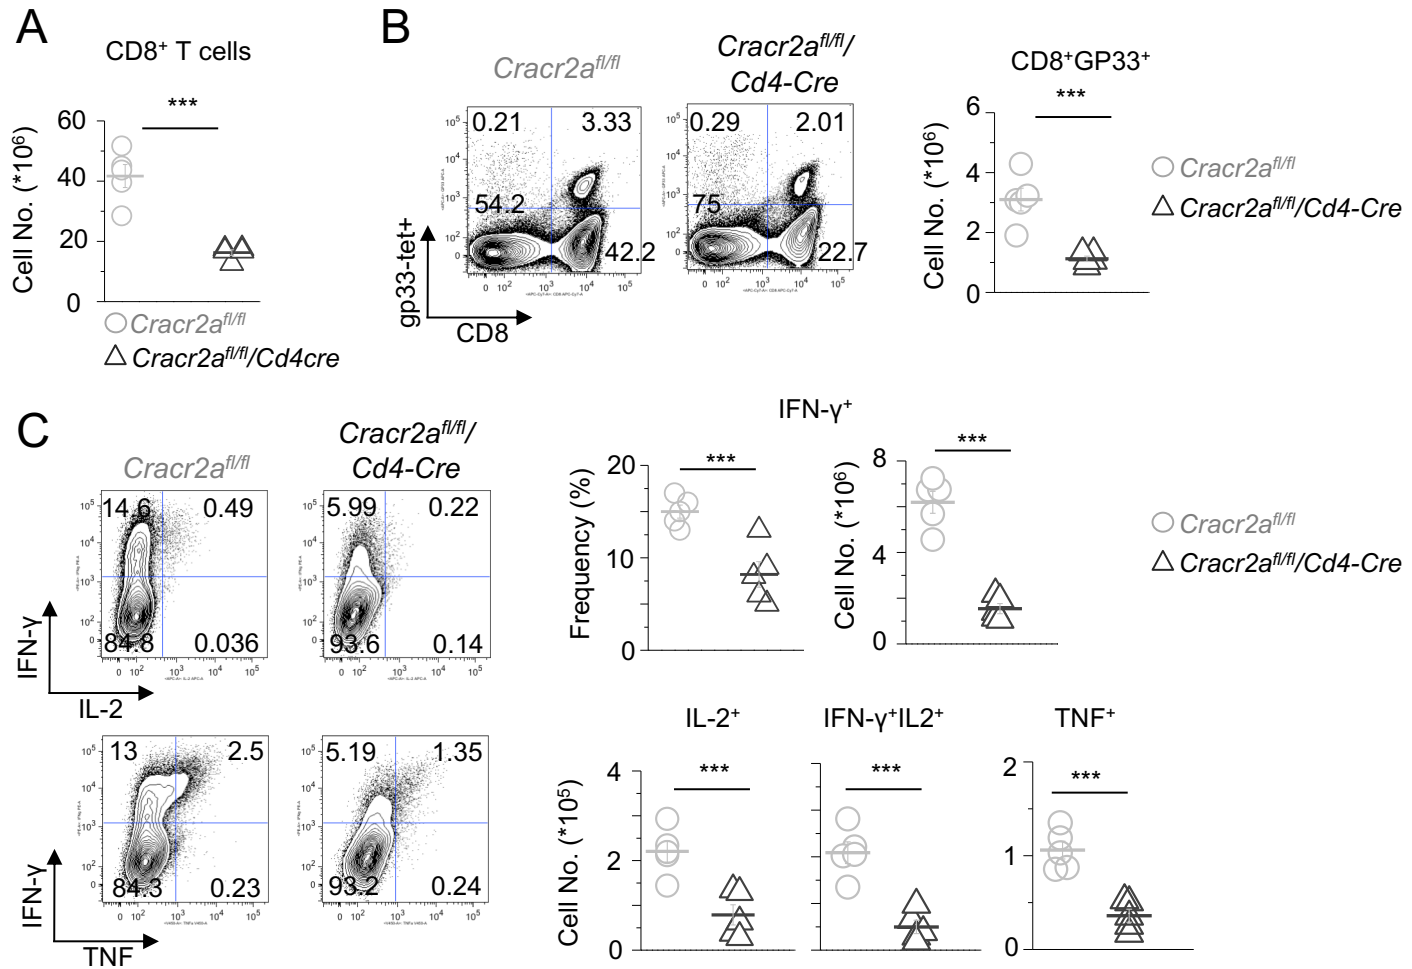

**Supplementary Figure 2. CRACR2A deficiency impairs CD8<sup>+</sup> T cell responses to acute infection with LCMV**

(A) Number of splenic CD8<sup>+</sup> T cells on day 8 after LCMV-Armstrong infection of *Cracr2a<sup>fl/fl</sup>* or *Cracr2a<sup>fl/fl</sup>/Cd4-Cre* mice. Each symbol represents data obtained from an independent animal.

(B) Representative flow plots showing the frequency of LCMV-specific IAb-gp33 tetramer-positive CD8<sup>+</sup> T cells (gp33-tet). Graph shows absolute numbers of gp33-tetramer-positive LCMV-specific CD8<sup>+</sup> T cells from independent animals.

(C) Representative flow plots showing the frequency and numbers of cells producing IFN-γ vs. IL-2, or IFN-γ vs. TNF on day 8 after LCMV infection following ex vivo stimulation for 5 hours with gp33 peptide. Graphs show quantification of frequency or numbers of IFN-γ<sup>+</sup>CD8<sup>+</sup> T cells (top) and absolute numbers of IFN-γ<sup>+</sup>, IFN-γ<sup>+</sup>IL-2<sup>+</sup> or TNF<sup>+</sup> CD8<sup>+</sup> T cells (bottom) from independent animals. The LCMV infection data are representative of three independent experiments with 4-6 animals in each experiment.

\*\*\* p < 0.0005.

**Supplementary Table 1. List of primers and shRNAs used in this study**

| Gene name                          | Forward Primer                 | Reverse Primer                  | Comments                                                                   |
|------------------------------------|--------------------------------|---------------------------------|----------------------------------------------------------------------------|
| hCRACRZA_shRNA1 (mature antisense) | ATACACCTTCTTCATGGCG            |                                 | In pLKO.1 vector<br>Silencing of all isoforms                              |
| hCRACRZA_shRNA2 (mature antisense) | TTTCAGCTGGTAATCTCAGC           |                                 | In pLKO.1 vector<br>Silencing of all isoforms – gave best knockdown effect |
| hCRACRZA_shRNA3 (mature antisense) | ATCACCTTCATCTCCAACAC           |                                 | In pLKO.1 vector<br>Silencing of all isoforms                              |
| hCRACRZA_shRNA4 (mature antisense) | TTTGCTCCTGAGTCCCTTCT           |                                 | In pLKO.1 vector<br>Silencing of all isoforms                              |
| hCRACRZA_shRNA5 (mature antisense) | AAGTGACTAAATCCAGTAGTG          |                                 | In pLKO.1 vector<br>Silencing of all isoforms                              |
| CRACR2A – genotyping – Flox allele | CTA TTC ACA GTT GCC ATT TCT GC | GAT TGG AGG TGA TCC TGC AA      | 195 bp –WT allele, 350 bps – Flox allele                                   |
| CRACR2A genotyping – KO allele     | CTA TTC ACA GTT GCC ATT TCT GC | TGC ATC CTC TAG TCA TTT ACC TAG | 255 bps – KO allele                                                        |
| Integrin $\alpha$ 4                | GATGCTGTGTGACTTCGG             | ACCACTGAGGCATTAGAGAGC           | For qPCR                                                                   |
| CCRS                               | CGAAAACACATGGTCAAACG           | TTCTACTCCCAAGCTGCAT             | For qPCR                                                                   |
| CXCR3                              | TGCTAGATGCCTCGGACTTT           | ATAAGACGGATGGCCTTGTTG           | For qPCR                                                                   |
| Integrin $\alpha$ L                | CCAGACTTTTGCTACTGGGAC          | GCTTGTTCGGCAGTGATAGAG           | For qPCR                                                                   |
| CCR6                               | CCTCATTCTTAGGACTGGAGC          | GGCAATCAGAGCTCTCGGA             | For qPCR                                                                   |
| IL-23R                             | ACACTGGGAAGCCTACCTACA          | AGCTTGACCACCAATA                | For qPCR                                                                   |
| GM-CSF                             | TTTACTTTCTGGGATTG              | TAGTGGCTGTCAATGTTCAA            | For qPCR                                                                   |
| GATA-3                             | CTCGCCATTCTGACATGGAA           | GGATACCTCTGCACCTAGC             | For qPCR                                                                   |
| IFN- $\gamma$                      | ACTGGCAAAGGATGGTG              | GTTGCTGATGGCCTGATT              | For qPCR                                                                   |
| T-bet                              | CAACAACCCCTTGCCAAAG            | TCCCCAAGCAGTTGACAGT             | For qPCR                                                                   |
| IL-17A                             | CTCCAGAAGGCCCTCAGACTA          | AGCTTCCCTCCGATTGACA             | For qPCR                                                                   |
| ROR $\gamma$                       | CACGGCCCTGTTCTCAT              | CAGATGTTCCACTCTCTCTCTCT         | For qPCR                                                                   |
| Runx1                              | ACT TCC TCT GCT CCG TGC TA     | CGC GGT AGC ATT TCT CAG TT      | For qPCR                                                                   |
| Runx3                              | CTC CAG CCC GAG ACT ACA AG     | AGG GAG GGA GAG AAA GTC CA      | For qPCR                                                                   |
